# Supplementary material
Source: PubMed Central journal article supplement (PMC5373048)
Supplement: supp_pp.16.01512_PP2016-01512DR2_Supplemental_Material.pdf [file supp_pp.16.01512_PP2016-01512DR2_Supplemental_Material.pdf]

1 **Supplemental Table S1. Primers used in this study**

2

| NOTE                                                         | Primer Name                       | Sequence (5'-3')                                              |
|--------------------------------------------------------------|-----------------------------------|---------------------------------------------------------------|
| For generating Tm-2 <sup>2</sup> -LIC/<br>tm-2-LIC<br>vector | Tm-2 <sup>2</sup> -LIC1-F         | <b>CGACGACAAGACCGT</b> GACCATGGCTGAAATTCTT<br>CTTACATCAG      |
|                                                              | Tm-2 <sup>2</sup> -NO STOP-LIC2-R | <b>GAGGAGAAGAGCCGT</b> CGTTTACTCAGCTTTTAA<br>AGCCGTTC         |
|                                                              | Tm-2 <sup>2</sup> -STOP-LIC2-R    | <b>GAGGAGAAGAGCCGT</b> CATTTACTCAGCTTTTAA<br>GCCGTTC          |
| For generating<br>D481V mutant                               | D481V-F                           | GTCGCATACATGTCTTGTACATAG                                      |
|                                                              | D481V-R                           | CTATGTAACAAGACATGTATGCGAC                                     |
| For generating<br>K191R mutant                               | K191R-F                           | CCGGTCTGGGGAGAACAACCTTTGC                                     |
|                                                              | K191R-R                           | GCAAGAGTTGTTCTCCCCAGACCGG                                     |
| For generating<br>CC-LIC vector                              | Tm-2 <sup>2</sup> -LIC1-F         | see above                                                     |
|                                                              | CC-NO STOP-LIC2-R                 | see above                                                     |
| For generating<br>NBS-LIC vector                             | NBS-LIC1-F                        | <b>CGACGACAAGACCGT</b> GACCATGGTTCTGCTGGA<br>TCGGAGAAGATTA    |
|                                                              | NBS-NO STOP-LIC2-R                | <b>GAGGAGAAGAGCCGT</b> CGCTTAGCCAAGTCCACA<br>CACAAC           |
| For generating<br>LRR-LIC vector                             | LRR-LIC1-F                        | <b>CGACGACAAGACCGT</b> CACCATGCGAGAGGCTGA<br>GGATTTGGCGG      |
|                                                              | Tm-2 <sup>2</sup> -NO STOP-LIC2-R | see above                                                     |
| For generating<br>ΔCC-LIC vector                             | NBS-LIC1-F                        | see above                                                     |
|                                                              | Tm-2 <sup>2</sup> -NO STOP-LIC2-R | see above                                                     |
| For generating<br>ΔLRR15-LIC<br>vector                       | Tm-2 <sup>2</sup> -LIC1-F         | see above                                                     |
|                                                              | ΔLRR15-NO STOP-LIC2-R             | <b>GAGGAGAAGAGCCGT</b> CGATCCGTGCACGTTACT<br>TCAGAC           |
| For generating<br>TMV MP-LIC<br>vector                       | MP-LIC1-F                         | <b>CGACGACAAGACCGT</b> CACCATGGCTCTAGTTGTT<br>AAAGGAAAAG      |
|                                                              | MP-NO STOP-LIC2-R                 | <b>GAGGAGAAGAGCCGT</b> CGAAACGAATCCGATTCCG<br>GCGACAG         |
| For generating<br>MP N5-LIC<br>vector                        | N5-LIC1-F                         | <b>CGACGACAAGACCGT</b> CACCATGGCTAAAGGAAA<br>AGTGAATATCAATGAG |
|                                                              | MP-NO STOP-LIC2-R                 | see above                                                     |
| For generating<br>MP C81-LIC<br>vector                       | MP-LIC1-F                         | see above                                                     |
|                                                              | C81-NO STOP-LIC2-R                | <b>GAGGAGAAGAGCCGT</b> CGGGGCCCTCCGTCTCTC<br>ACGTTTGT         |
| For generating<br>p50-LIC vector                             | p50-LIC1-F                        | <b>CGACGACAAGACCGT</b> CACCATGGAGATAGAGTC<br>TTTAGAGCAG       |
|                                                              | P50-LIC2-R                        | <b>GAGGAGAAGAGCCGT</b> CGTTGTGTTCTGCATCG<br>ACCTTATAC         |

|                                                                      |                                  |                                                       |
|----------------------------------------------------------------------|----------------------------------|-------------------------------------------------------|
| For generating Tm-2 <sup>2</sup> -cYFP-LIC and tm-2-cYFP-LIC vectors | Tm-2 <sup>2</sup> -LIC1-F        | see above                                             |
|                                                                      | Tm-2 <sup>2</sup> -cYFP-Fusion-R | acctccgccagatgagccacctccTTTACTCAGCTTTTAA<br>AGCCGTTC  |
|                                                                      | cYFP-Fusion-F                    | ggaggtggctcatctggcggaggtGACAAGCAGAAGAA<br>CGGCATC     |
|                                                                      | cYFP-LIC2-R                      | <b>GAGGAGAAGAGCCGT</b> CGCTTGTACAGCTCGTCC<br>ATGCCGAG |
| For generating MP-nYFP-LIC vector                                    | MP-LIC1-F                        | see above                                             |
|                                                                      | MP-nYFP-Fusion-R                 | acctccgccagatgagccacctccCGAAACGAATCCGAT<br>TCGGCGACAG |
|                                                                      | nYFP-Fusion-F                    | ggaggtggctcatctggcggaggtGTGAGCAAGGGCGA<br>GGAGCTG     |
|                                                                      | nYFP-LIC2-R                      | <b>GAGGAGAAGAGCCGT</b> CGGGCCATGATATAGACG<br>TTGTGG   |
| For generating p50-nYFP-LIC vector                                   | p50-LIC1-F                       | see above                                             |
|                                                                      | p50-nYFP-Fusion-R                | acctccgccagatgagccacctccTTGTGTTCTGCATCG<br>ACCTTATAC  |
|                                                                      | nYFP-Fusion-F                    | see above                                             |
|                                                                      | nYFP-LIC2-R                      | see above                                             |

3 Sequences in bold represent for LIC1 or LIC2 adaptor sequence.
